# Supplementary material for: Intrinsic low dielectric constant polyimides: relationship between molecular structure and dielectric properties
Source: Royal Society of Chemistry journal article supplement (doi:10.1039/c7tc04220e), 2017-01-01
Supplement: c7tc04220e1.pdf [file c7tc04220e1.pdf]

## Supporting Information

# Intrinsic Low Dielectric Constant Polyimides: Relationship between Molecular Structures and Dielectric Properties

Runxin Bei, Chao Qian, Yi Zhang,\* Zhenguo Chi, Siwei Liu, Xudong Chen, Jiarui Xu, and Matthew P. Aldred

PCFM Lab, GD HPPC Lab, Guangdong Engineering Technology Research Centre for High-performance Organic and Polymer Photoelectric Functional Films, State Key Laboratory of Optoelectronic Materials and Technologies, School of Chemistry, Sun Yat-sen University, Guangzhou 510275, China.

### List of Contents for Supplementary Materials:

|                                                                                                                                    |    |
|------------------------------------------------------------------------------------------------------------------------------------|----|
| <b>Scheme S1.</b> Reaction mechanism discussion of synthesizing <b>mBPPy</b> and <b>mTPPy</b> .....                                | 2  |
| <b>Figure S1.</b> <sup>1</sup> H-NMR spectra of the diamines <b>PPy</b> (a), <b>mBPPy</b> (b) and <b>mTPPy</b> (c) .....           | 3  |
| <b>Figure S2.</b> <sup>13</sup> C-NMR spectra of diamines <b>PPy</b> (a), <b>mBPPy</b> (b) and <b>mTPPy</b> (c) .....              | 4  |
| <b>Figure S3.</b> FT-IR spectra of diamines <b>PPy</b> , <b>mBPPy</b> and <b>mTPPy</b> .....                                       | 5  |
| <b>Figure S4.</b> <sup>1</sup> H-NMR spectra of polyimides <b>PPy6F</b> (a), <b>mBPPy6F</b> (b) and <b>mTPPy6F</b> (c) .....       | 6  |
| <b>Figure S5.</b> Thermal properties of polyimides <b>PPy6F</b> , <b>mBPPy6F</b> and <b>mTPPy6F</b> : (a)DMA; (b)TMA; (c)TGA ..... | 7  |
| <b>Table S1.</b> The details in dielectric measurements of polyimides at 10 <sup>4</sup> Hz .....                                  | 8  |
| <b>Table S2.</b> Intrinsic low- <i>k</i> polyimides and their structure. <sup>20, 21, 50-57</sup> .....                            | 8  |
| <b>Figure S6.</b> Schematic diagram of the devices fabricated with PIs .....                                                       | 10 |

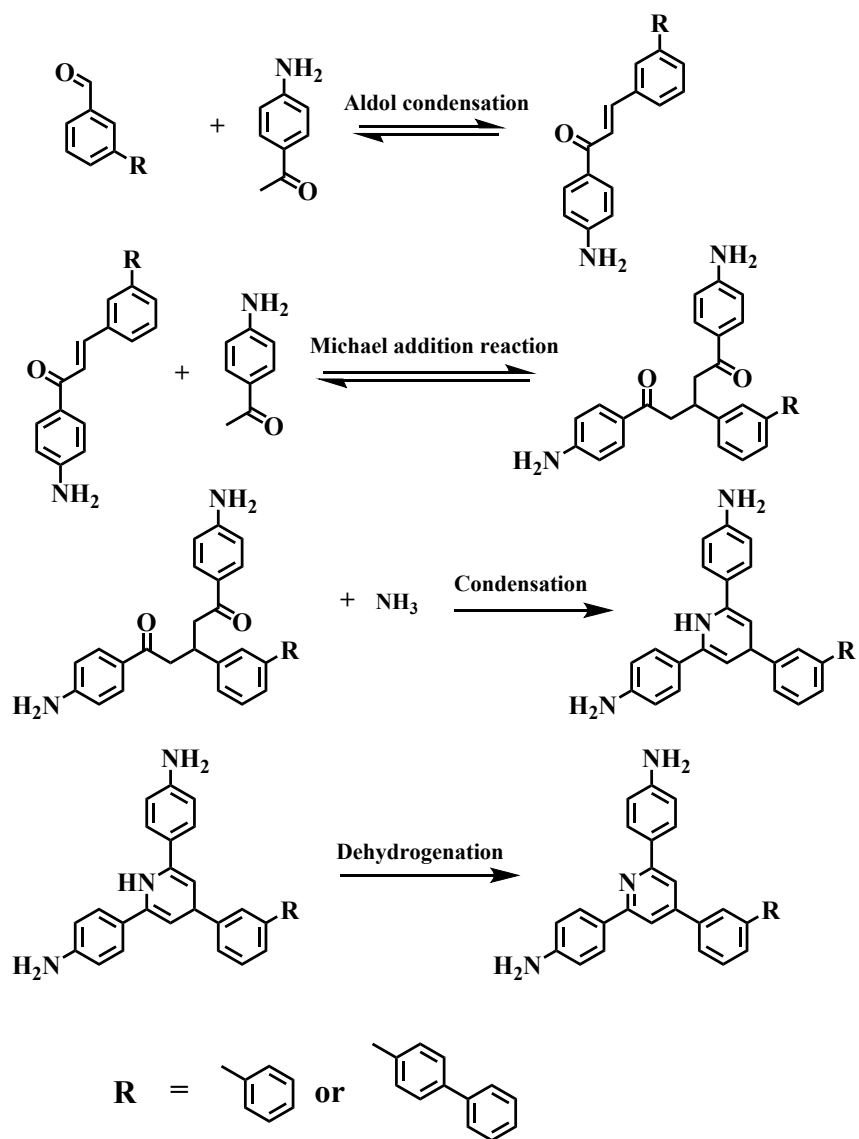

**Scheme S1.** Reaction mechanism discussion of synthesizing mBPPy and mTPPy.

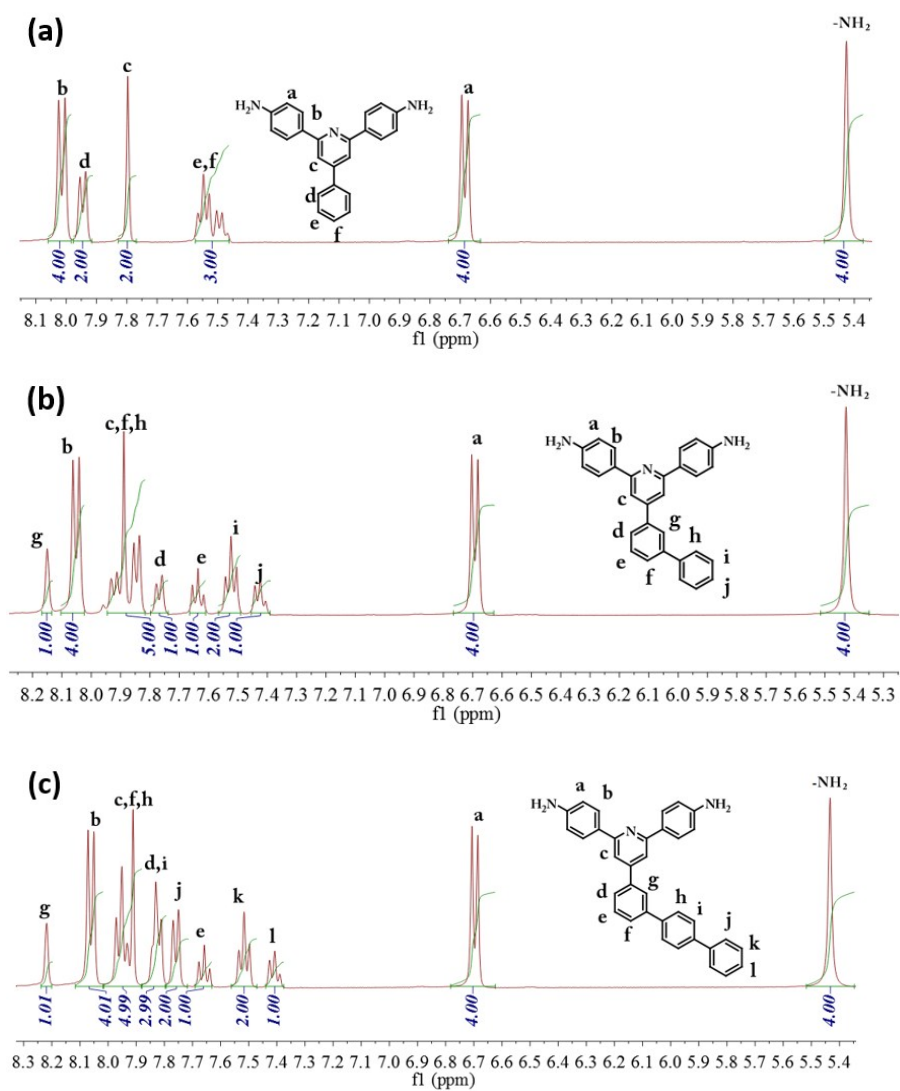

**Figure S1.**  $^1\text{H-NMR}$  spectra of the diamines PPy (a), mBPPy (b) and mTPPy (c).

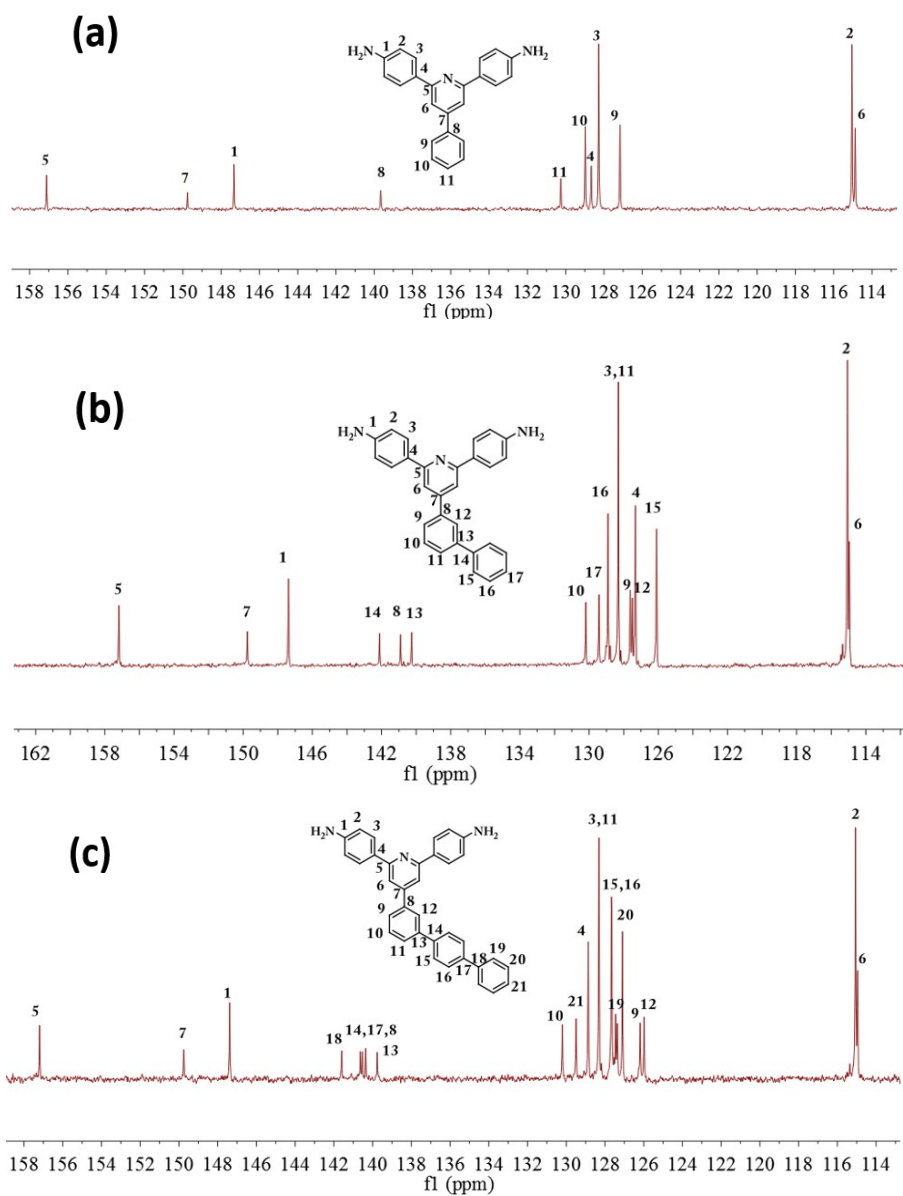

**Figure S2.**  $^{13}\text{C}$ -NMR spectra of diamines **PPy** (a), **mBPPy** (b) and **mTPPy** (c).

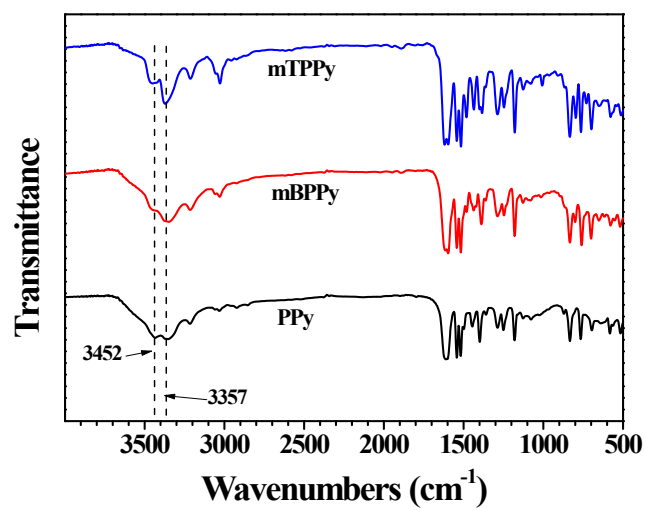

Figure S3. FT-IR spectra of diamines PPy, mBPPy and mTPPy.

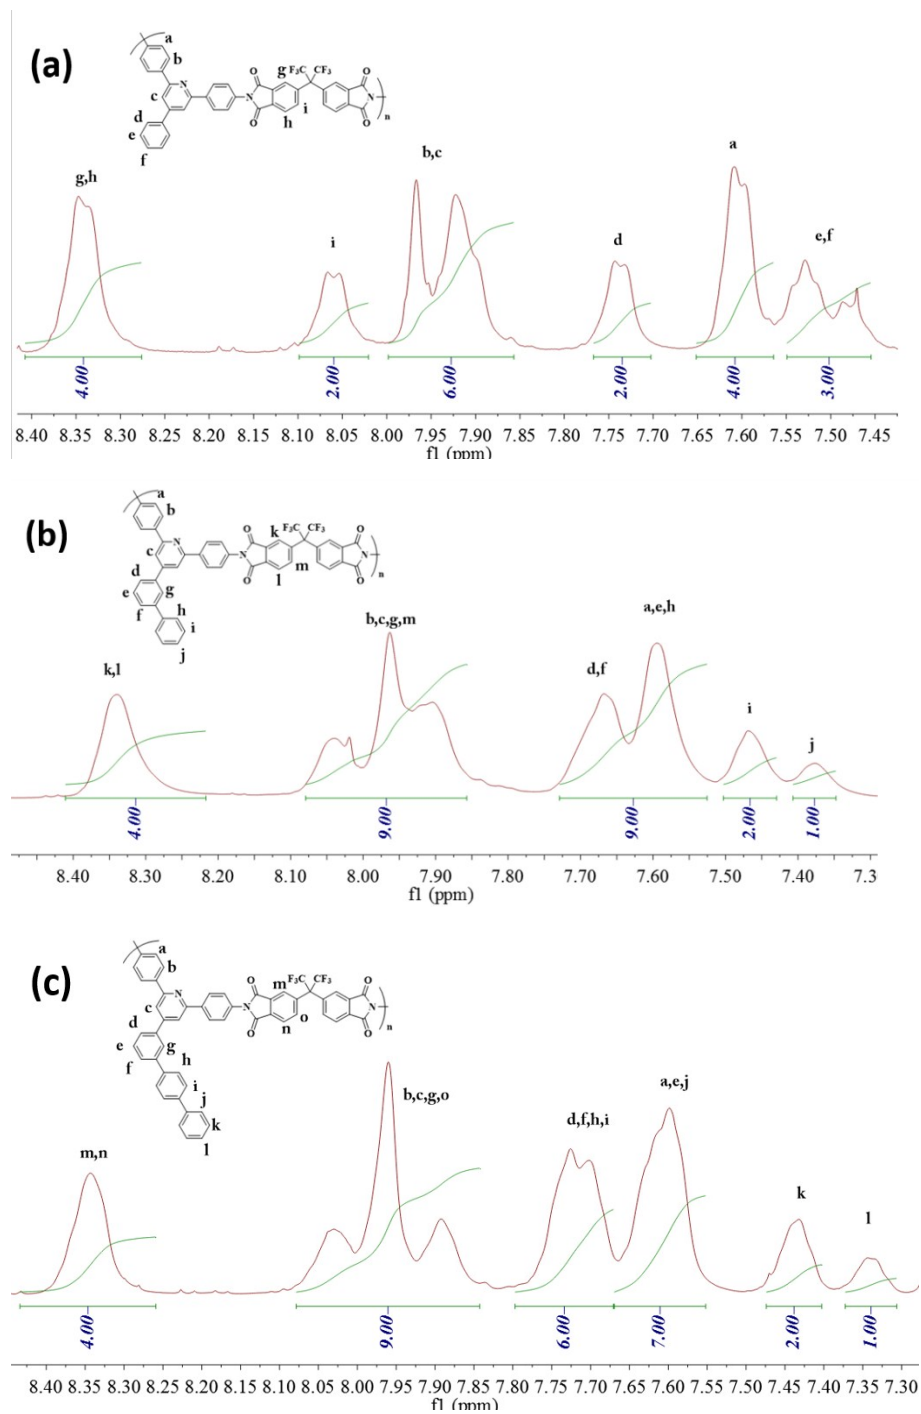

**Figure S4.** <sup>1</sup>H-NMR spectra of polyimides PPy6F (a), mBPPy6F (b) and mTPPy6F (c).

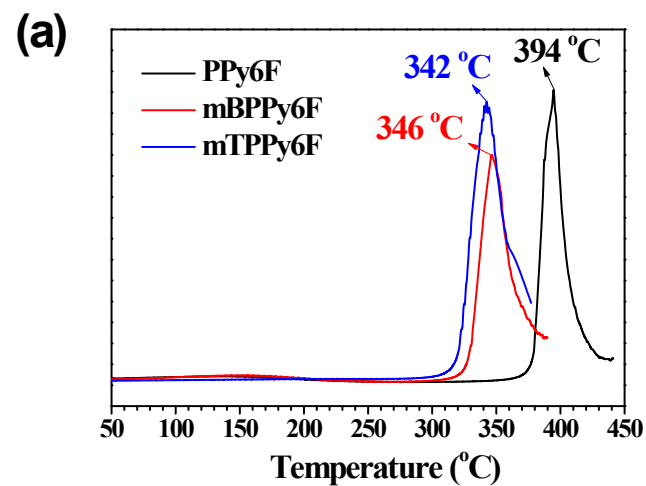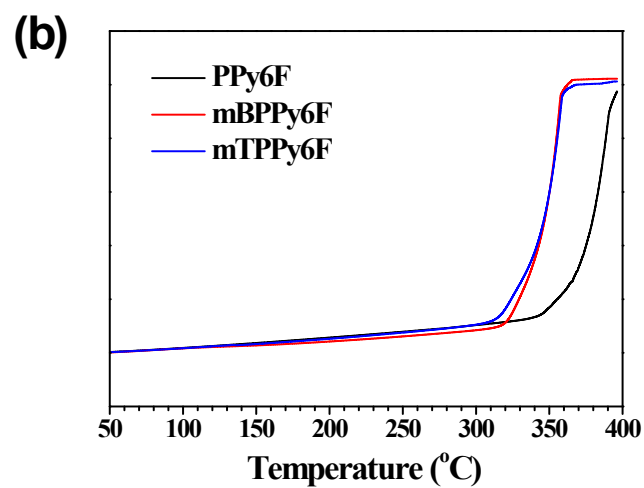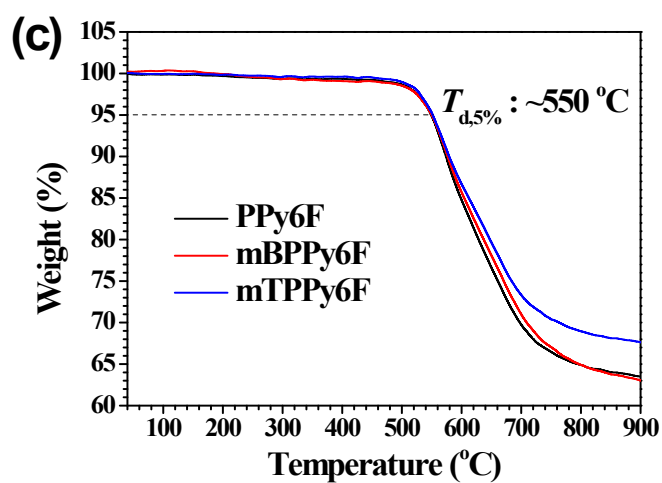

Figure S5. Thermal properties of polyimides PPy6F, mBPPy6F and mTPPy6F: (a)DMA; (b)TMA; (c)TGA.

**Table S1.** The details in dielectric measurements of polyimides at 10<sup>4</sup> Hz

| Polyimides     | $A$ ( $\times 10^{-4}$ m <sup>2</sup> ) | $k_0$ ( $\times 10^{-12}$ F·m <sup>-1</sup> ) | $l$ ( $\times 10^{-6}$ m) | $C$ ( $\times 10^{-11}$ F) | $k$  |
|----------------|-----------------------------------------|-----------------------------------------------|---------------------------|----------------------------|------|
| <b>PPy6F</b>   | 1.0404                                  | 8.854                                         | 113                       | 2.29                       | 2.81 |
| <b>mBPPy6F</b> | 1.0404                                  | 8.854                                         | 105                       | 2.29                       | 2.61 |
| <b>mTPPy6F</b> | 1.0404                                  | 8.854                                         | 100                       | 2.25                       | 2.44 |

The error of the film thickness is  $1 \times 10^{-6}$  m, the relative error is 0.9%-1%, the error of the capacitance is  $1 \times 10^{-13}$  F, the relative error is about 0.5%. According to the Eqn.1, the relative error of  $k$  is 1.5%.

**Table S2.** Intrinsic low- $k$  polyimides and their structure. <sup>20, 21, 50-57</sup>

| Polyimides      | Structure                                                                            |
|-----------------|--------------------------------------------------------------------------------------|
| <b>FPTTPI</b>   | 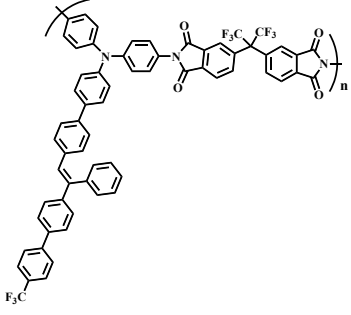  |
| <b>PFCBBPPI</b> |  |
| <b>PI-8</b>     |  |
| <b>7d''</b>     |  |
| <b>7d'</b>      |  |
| <b>PI-1</b>     |  |
| <b>5d</b>       |  |



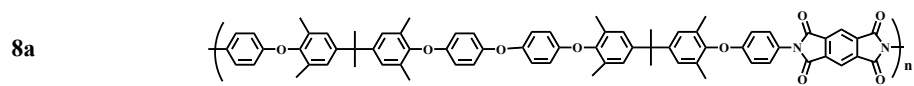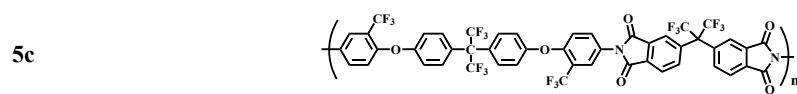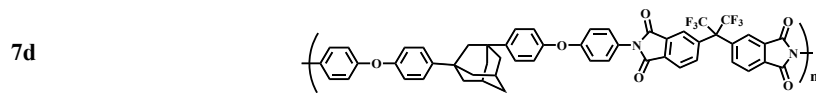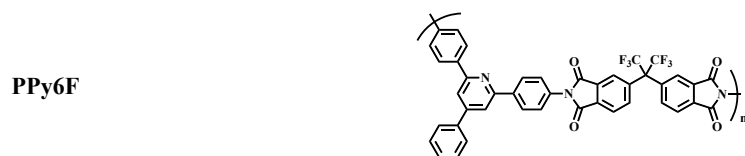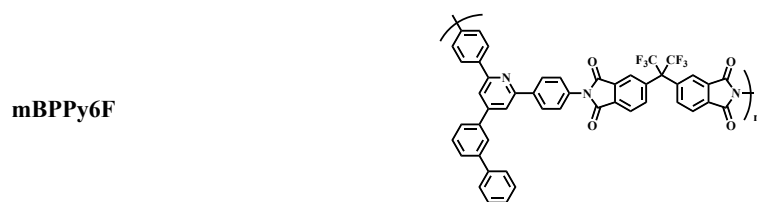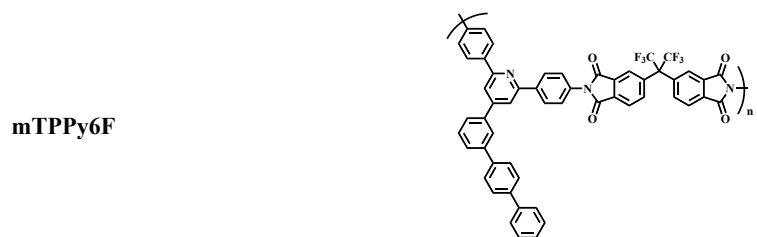

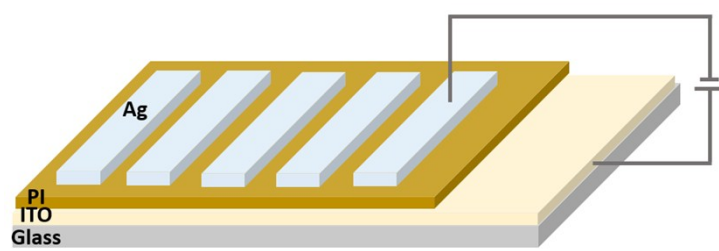

**Figure S6.** Schematic diagram of the devices fabricated with PIs.
